# Supplementary material for: High resolution linear epitope mapping of the receptor binding domain of SARS-CoV-2 spike protein in COVID-19 mRNA vaccine recipients
Source: bioRxiv or medRxiv preprint supplement (doi:10.1101/2021.07.03.21259953), 2021-07-23
Supplement: Supplementary file [file media-1.pdf]

Supplemental Table 1. Detailed information of subjects from vaccine recipients(N=21) and COVID-19 patients (N=20).

| Vaccine recipients | age range | sex | serum collection date after second dose (d) | NT50  | anti-RBD IgG | ratio anti-RBD IgG/NT50 | anti-N IgG |
|--------------------|-----------|-----|---------------------------------------------|-------|--------------|-------------------------|------------|
| V01                | 31-40     | M   | 21                                          | 151.1 | 12630.5      | 83.6                    | 0.11       |
| V02*1              | 61-70     | M   | 21                                          | 41.0  | 2829.3       | 69.0                    | 0.23       |
| V03                | 31-40     | F   | 21                                          | 463.6 | 31933.3      | 68.9                    | 0.12       |
| V04                | 31-40     | M   | 20                                          | 246.4 | 8870.4       | 36.0                    | 0.06       |
| V05*1              | 51-60     | F   | 19                                          | 235.6 | 39681.9      | 168.4                   | 0.05       |
| V06*1              | 31-40     | M   | 20                                          | 222.1 | 14224.0      | 64.0                    | 0.06       |
| V07*1              | 31-40     | F   | 20                                          | 360.3 | 12494.9      | 34.7                    | 0.03       |
| V08*1              | 31-40     | F   | 17                                          | 515.6 | 16998.9      | 33.0                    | 0.40       |
| V09                | 31-40     | F   | 21                                          | 218.8 | 15608.2      | 71.3                    | 0.01       |
| V10                | 41-50     | M   | 21-28                                       | 33.8  | 5234.3       | 154.8                   | 0.03       |
| V11                | 41-50     | F   | 21-28                                       | 165.7 | 7298.5       | 44.0                    | 0.01       |
| V12                | 31-40     | F   | 21-28                                       | 487.9 | 20656.3      | 42.3                    | 0.04       |
| V13                | 51-60     | F   | 21-28                                       | 49.3  | 6136.1       | 124.6                   | 0.03       |
| V14                | 51-60     | F   | 21-28                                       | 64.9  | 1485.3       | 22.9                    | 0.02       |
| V15                | 51-60     | F   | 21-28                                       | 222.9 | 9074.9       | 40.7                    | 0.02       |
| V16                | 41-50     | F   | 21-28                                       | 80.8  | 3484.7       | 43.2                    | 0.02       |
| V17                | 31-40     | F   | 21-28                                       | 24.2  | 710.1        | 29.3                    | 0.04       |
| V18                | 41-50     | F   | 21-28                                       | 539.9 | 2760.8       | 5.1                     | 0.01       |
| V19                | 51-60     | F   | 21-28                                       | 239.0 | 4371.4       | 18.3                    | 0.01       |
| V20                | 31-40     | F   | 21-28                                       | 149.7 | 16783.7      | 112.1                   | 0.03       |
| V21                | 81-90     | F   | 21-28                                       | 225.4 | 227.6        | 1.0                     | 0.03       |

| COVID-19 patients | age range | sex | days after onset (d) | NT50           | anti-RBD IgG | ratio anti-RBD IgG/NT50 | severity of the disease*2 |
|-------------------|-----------|-----|----------------------|----------------|--------------|-------------------------|---------------------------|
| P01*1             | 51-60     | M   | 19                   | 17414.0        | 7231.4       | 0.4                     | critical                  |
| P02*1             | 31-40     | M   | 12                   | 1902.0         | 13110.0      | 6.9                     | critical                  |
| P03*1             | 71-80     | M   | 20                   | 1449.0         | 19727.0      | 13.6                    | critical                  |
| P04*1             | 41-50     | M   | 18                   | 3271.0         | 20586.5      | 6.3                     | critical                  |
| P05*1             | 61-70     | M   | 29                   | 1029.0         | 12728.0      | 12.4                    | critical                  |
| P06*1             | 81-90     | M   | 16                   | 3959.0         | 21184.0      | 5.4                     | critical                  |
| P07*1             | 71-80     | M   | 20                   | 14990.0        | 36627.7      | 2.4                     | critical                  |
| P08*1             | 21-30     | F   | 14                   | 212.6          | 1351.7       | 6.4                     | mild                      |
| P09*1             | 71-80     | M   | 10                   | 2174.0         | 3449.9       | 1.6                     | moderate                  |
| P10*1             | 31-40     | F   | 13                   | data missing*3 |              |                         | moderate                  |
| P11               | 21-30     | F   | 49                   | 268.0          | 1051.5       | 3.9                     | mild                      |
| P12               | 51-60     | F   | 49                   | 331.9          | 4815.4       | 14.5                    | moderate                  |
| P13               | 21-30     | F   | 49                   | 176.1          | 866.7        | 4.9                     | mild                      |
| P14               | 21-30     | F   | 49                   | 328.0          | 1355.8       | 4.1                     | mild                      |
| P15               | 21-30     | F   | 63                   | 129.3          | 1185.2       | 9.2                     | mild                      |
| P16               | 31-40     | F   | 49                   | 382.4          | 2198.7       | 5.7                     | moderate                  |
| P17               | 51-60     | F   | 49                   | 374.8          | 5433.1       | 14.5                    | mild                      |

|     |       |   |    |       |        |      |          |
|-----|-------|---|----|-------|--------|------|----------|
| P18 | 21-30 | F | 49 | 208.0 | 3470.2 | 16.7 | mild     |
| P19 | 31-40 | F | 49 | 154.8 | 1195.0 | 7.7  | moderate |
| P20 | 41-50 | F | 63 | 376.6 | 5069.5 | 13.5 | moderate |

\*1 Subject included in the epitope analysis

\*2 WHO COVID-19 Clinical management: living guidance, 25 January 2021, accessed 30 June 2021

\*3 Not sufficient serum volume could be obtained for these serological markers.

anti-RBD IgG; unit, AU/mL; Abbott SARS-CoV-2 IgG II Quant assay

anti-N IgG; unit, Index; Abbott SARS-CoV-2 IgG assay
