# Supplementary material for: High resolution linear epitope mapping of the receptor binding domain of SARS-CoV-2 spike protein in COVID-19 mRNA vaccine recipients
Source: bioRxiv or medRxiv preprint supplement (doi:10.1101/2021.07.03.21259953), 2021-07-23
Supplement: Supplementary file [file media-2.pdf]

Supplemental Table 2. Sequence of the peptides used in this study.

| Peptide No. | Sequence         |
|-------------|------------------|
| 1           | RVQPTESIVRFPNIT  |
| 2           | PTESIVRFPNITNLC  |
| 3           | SIVRFPNITNLCDFG  |
| 4           | RFPNITNLCDFGEVF  |
| 5           | NITNLCDFGEVFNAT  |
| 6           | NLCDFGEVFNATRFA  |
| 7           | PFGEVFNATRFASVY  |
| 8           | EVFNATRFASVYAWN  |
| 9           | NATRFASVYAWNRRK  |
| 10          | RFASVYAWNRRKRISN |
| 11          | SVYAWNRRKRISNCVA |
| 12          | AWNRRKRISNCVADYS |
| 13          | RKRISNCVADYSVLY  |
| 14          | ISNCVADYSVLYNSA  |
| 15          | CVADYSVLYNSASF   |
| 16          | DYSVLYNSASFSTFK  |
| 17          | VLYNSASFSTFKCYG  |
| 18          | NSASFSTFKCYGVSP  |
| 19          | SFSTFKCYGVSPTKL  |
| 20          | TFKCYGVSPTKLNDL  |
| 21          | CYGVSPTKLNDLCFT  |
| 22          | VSPTKLNDLCFTNVY  |
| 23          | TKLNDLCFTNVYADS  |
| 24          | NDLCFTNVYADSFVI  |
| 25          | CFTNVYADSFVIRGD  |
| 26          | NVYADSFVIRGDEV   |
| 27          | ADSFVIRGDEV      |
| 28          | FVIRGDEV         |
| 29          | RGDEV            |
| 30          | EVR              |
| 31          | QIAPG            |
| 32          | PGQTG            |
| 33          | TGKIAD           |
| 34          | IADYNYKLPDDFTGC  |
| 35          | YNYKLPDDFTGCVIA  |
| 36          | KLPDDFTGCVIAWNS  |
| 37          | DDFTGCVIAWNSNNL  |
| 38          | TGCVIAWNSNNLDSK  |
| 39          | VIAWNSNNLDSKVG   |
| 40          | WNSNNLDSKVG      |
| 41          | NNLDSKVG         |
| 42          | DSKVG            |
| 43          | VGGNYNYLYRFRKS   |
| 44          | NYNYLYRFRKSNLK   |
| 45          | LYRFRKSNLKPFE    |
| 46          | RLFRKSNLKP       |
| 47          | RKSNLKP          |
| 48          | NLKP             |
| 49          | PFERDISTEIQAGS   |
| 50          | RDISTEIQAGSTPC   |

|    |                 |
|----|-----------------|
| 51 | STEIQAGSTPCNGV  |
| 52 | IYQAGSTPCNGVEGF |
| 53 | AGSTPCNGVEGFNCY |
| 54 | TPCNGVEGFNCYFPL |
| 55 | NGVEGFNCYFPLQSY |
| 56 | EGFNCYFPLQSYGFQ |
| 57 | NCYFPLQSYGFQPTN |
| 58 | FPLQSYGFQPTNGVG |
| 59 | QSYGFQPTNGVGYQP |
| 60 | GFQPTNGVGYQP    |
| 61 | PTNGVGYQP       |
| 62 | GVGYQP          |
| 63 | YQP             |
| 64 | YRVVLSFELLHAPA  |
| 65 | VVLSFELLHAPATVC |
| 66 | SFELLHAPATVCGPK |
| 67 | LLHAPATVCGPKKST |
| 68 | APATVCGPKKSTNLV |
| 69 | TVCGPKKSTNLVKNK |
| 70 | GPKKSTNLVKNKCVN |
| 71 | PKKSTNLVKNKCVNF |

Single mutation containing peptides

| N417N |                 |
|-------|-----------------|
| 29    | RGDEV           |
| 30    | EVR             |
| 31    | QIAPG           |
| 32    | PGQTG           |
| 33    | TGNIAD          |
| N417T |                 |
| 29    | RGDEV           |
| 30    | EVR             |
| 31    | QIAPG           |
| 32    | PGQTG           |
| 33    | TGTIAD          |
| E484K |                 |
| 52    | IYQAGSTPCNGVKGF |
| 53    | AGSTPCNGVKGFNCY |
| 54    | TPCNGVKGFNCYFPL |
| 55    | NGVKGFNCYFPLQSY |
| 56    | KGFNCYFPLQSYGFQ |
| N501Y |                 |
| 57    | NCYFPLQSYGFQPTY |
| 58    | FPLQSYGFQPTYGVG |
| 59    | QSYGFQPTYGVGYQP |
| 60    | GFQPTYGVGYQP    |
| 61    | PTYGVGYQP       |
