# Supplementary material for: High resolution linear epitope mapping of the receptor binding domain of SARS-CoV-2 spike protein in COVID-19 mRNA vaccine recipients
Source: bioRxiv or medRxiv preprint supplement (doi:10.1101/2021.07.03.21259953), 2021-07-23
Supplement: Supplementary file [file media-3.pdf]

| Supplemental Table 3. Raw signal intensities (blank signals are subtracted). |          |         |          |          |          |          |          |          |          |          |          |          |         |         |         |
|------------------------------------------------------------------------------|----------|---------|----------|----------|----------|----------|----------|----------|----------|----------|----------|----------|---------|---------|---------|
| raw-bl                                                                       | V02      | V05     | V06      | V07      | V08      | P01      | P02      | P03      | P04      | P05      | P06      | P07      | P08     | P09     | P10     |
| 1                                                                            | 5898.755 | 11736.7 | 3502.173 | 4159.933 | 16225.4  | 1051.194 | 59.02    | 2425.419 | 1.929    | 176.222  | 131.111  | -4.778   | 41.656  | 15.889  | 4.333   |
| 2                                                                            | 1350.664 | 6681.4  | 1729.264 | 1373.111 | 7120.8   | 162.031  | 12.223   | 238.667  | -5.06    | 54.445   | 96.267   | -4.222   | 584.513 | 8.889   | -2.889  |
| 3                                                                            | 4975.265 | 8967.7  | 1907.9   | 2725.666 | 12677.1  | 25.767   | 16.111   | 83.222   | 11.495   | 88.778   | 135.322  | 0.889    | 17.677  | 14.666  | 2.889   |
| 4                                                                            | 2754.3   | 8186.6  | 2428.627 | 1970.777 | 11423.3  | 32.011   | 15.667   | 209.667  | 121.374  | 603.223  | 283.856  | -3.888   | 5.283   | 324.556 | -0.222  |
| 5                                                                            | 2092.24  | 4444.8  | 1547.809 | 2309.733 | 12655    | 22.02    | 18.555   | 69.475   | 232.293  | 156.667  | 341.511  | -6.111   | 8.475   | 146.361 | -1.333  |
| 6                                                                            | 1549.664 | 4037.4  | 1515.173 | 2754.444 | 16892.9  | 15.262   | 23       | 27.989   | 121.989  | 538.111  | 1184.744 | -3.334   | 24.899  | 27.444  | 1.333   |
| 7                                                                            | 640.8456 | 760.8   | 987.7179 | 3153.969 | 11193.9  | 43.949   | 23.889   | 12.495   | 150.677  | 1520.889 | 946.422  | -0.556   | 67.586  | 26      | 4.889   |
| 8                                                                            | -241.063 | 346.4   | 1326.173 | 3226.666 | 10198.6  | 11.798   | 8.667    | 16.616   | 126.707  | 795.222  | 152.189  | 14       | 12.071  | 3.222   | 25.889  |
| 9                                                                            | 75.29957 | 2671.5  | 1294.355 | 2029.111 | 9290.7   | 230.273  | 50.333   | 43.636   | 229.1    | 803.667  | 213      | 110.556  | 19.636  | 59.333  | 84.333  |
| 10                                                                           | 783.6636 | 2775.9  | 3155.627 | 2308.111 | 9684.2   | 48.717   | 11       | 115.136  | 421.444  | 986.444  | 345.044  | 79.333   | 77.808  | 292.444 | 30.777  |
| 11                                                                           | 565.5726 | 4727.5  | 1831.082 | 1770     | 6061.6   | 70.353   | 56.777   | 223.829  | 442.262  | 1359.444 | 273.744  | 101.777  | 26.171  | 150.444 | 7.888   |
| 12                                                                           | 2086.573 | 7081.68 | 668.8999 | 1886.333 | 5961.1   | 521.278  | 50.778   | 111.596  | 1345.869 | 1190.111 | 1404.378 | 1720.778 | 15.869  | 34.111  | 7.111   |
| 13                                                                           | 4647.755 | 9963.40 | 1550.718 | 2269.444 | 7744.2   | 655.762  | 77.889   | 81.697   | 862.083  | 2012.333 | 1528.19  | 554.333  | 37.904  | 57.111  | 4.889   |
| 14                                                                           | 1086.573 | 4081.68 | -57.0091 | 1769.889 | 5955.4   | 509.142  | 54.889   | 78.596   | 1265.323 | 1897.445 | 797.378  | 291      | 20.596  | 218.889 | 8.334   |
| 15                                                                           | 2692.3   | 5300.4  | 1196.718 | 220.3333 | 5703.7   | 78       | 2.111    | 258.969  | 10.515   | 104.444  | 131.333  | -6.667   | 4.606   | 36.444  | 2.777   |
| 16                                                                           | 2582.3   | 7162.1  | 1384.446 | 1027.777 | 7176.4   | 72.678   | 126.861  | 3853.064 | 35.178   | 73.445   | 455.667  | 12.889   | 33.678  | 15.778  | 8.778   |
| 17                                                                           | 790.2726 | 4547.9  | 453.0819 | 586.6663 | 4360.5   | 18.856   | 3.778    | 496.402  | 38.778   | 39.112   | 235      | -4.111   | 10.829  | 10.334  | -0.444  |
| 18                                                                           | 440.4816 | 3810.4  | 1532.627 | 1619.333 | 5671.8   | 33.478   | 6.111    | 1892.547 | 321.945  | 195.222  | 310.978  | -0.111   | 5.233   | 39.945  | 4.222   |
| 19                                                                           | 2945.573 | 4096.4  | 1838.809 | 3424.333 | 12593.7  | 75.333   | 83.222   | 239.717  | 105.844  | 275      | 615.044  | 6.333    | 11.535  | 39.694  | 12.694  |
| 20                                                                           | 1009.3   | 4528.9  | 1680.264 | 2497.444 | 11885.3  | 64.411   | 62.667   | 35.929   | 105.986  | 310.333  | 672.411  | 0.667    | 22.111  | 17.555  | 3.555   |
| 21                                                                           | -413.245 | -156.5  | 273.2639 | 793.2223 | 6931.4   | 166.677  | 112.639  | 109.222  | 128.858  | 413.389  | 241.822  | 4.333    | 7.586   | 11.889  | 13.444  |
| 22                                                                           | -913.245 | 184.6   | 306.8999 | 921.8893 | 5217.6   | 5.811    | 5.778    | 5.747    | 112.475  | 745.528  | 101.411  | -0.556   | -1.434  | -1.778  | 7.667   |
| 23                                                                           | -590.245 | -556.1  | 115.4459 | 2383.222 | 4072.1   | 17.678   | 13.667   | 1.687    | 859.349  | 525.556  | 932.361  | 71.556   | 3.869   | 32.111  | -2.778  |
| 24                                                                           | -22.0634 | -210.1  | 890.2639 | 1027.889 | 3273.6   | 44.011   | 56.333   | 24.566   | 481.194  | 835.361  | 319.611  | 12.222   | 26.566  | 106.778 | 2.222   |
| 25                                                                           | 1029.664 | 2737.1  | 1561.809 | 1963     | 3496.4   | 241.1    | 50.778   | 319.909  | 409.273  | 1208     | 939.778  | 88.444   | 7.545   | 155.889 | 7       |
| 26                                                                           | 1917.823 | 3163.8  | 335.1729 | 1712.777 | 9629.1   | 1082.079 | 235.666  | 7295.389 | 4525.586 | 9002.068 | 1748.922 | 2271     | 16.313  | 168.222 | 16.778  |
| 27                                                                           | 3878.406 | 7128.6  | -70.4641 | 8509.976 | 16659.01 | 12103.16 | 5406.706 | 370      | 30378.3  | 25759.35 | 21583    | 30366.44 | 455.067 | 247.111 | -28.556 |
| 28                                                                           | 4155.073 | 11292.5 | 1004.536 | 3399.111 | 7624.8   | 1007.578 | 368.667  | 70.596   | 11428.14 | 5326.889 | 1499.278 | 4860.111 | 29.414  | 207.778 | 1.556   |
| 29                                                                           | 3932.755 | 9894.7  | 1594.718 | 2182.788 | 7861.5   | 66.844   | 7.333    | 595.717  | 34.899   | 89.555   | 252.544  | 7.333    | 34.044  | 12.555  | -7      |
| 30                                                                           | 3599.3   | 8319.0  | 893.6269 | 1149.555 | 7451.009 | 100.589  | 25.333   | 776.162  | 1113.356 | 118.667  | 1204.525 | 52.043   | 253.089 | 88.556  | 4.445   |
| 31                                                                           | 674.0276 | 4485.7  | 583.0819 | 160.0003 | 1701.1   | 543.361  | 81.384   | 1247.02  | 2065.911 | 300.111  | 1364.838 | 85.202   | 94.211  | 62      | 18.111  |
| 32                                                                           | 767.6636 | 3662.1  | 673.4459 | 432.0003 | 4726.2   | 88.678   | 15.445   | 248.323  | 365.778  | 482.111  | 588.778  | 16.667   | 8.878   | 60      | 14      |

|    |          |         |          |          |          |          |         |         |          |          |          |          |          |         |         |
|----|----------|---------|----------|----------|----------|----------|---------|---------|----------|----------|----------|----------|----------|---------|---------|
| 33 | 1575.209 | 3954.1  | 1644.718 | 1247     | 7179.4   | 1100.692 | 363.214 | 283.909 | 797.462  | 574.778  | 1407.636 | 797.643  | 60.6     | 421.917 | 230.643 |
| 34 | -123.427 | 2180.4  | 565.0819 | 626.4443 | 5718.4   | 135.078  | 265.695 | 55.233  | 2872.153 | 166.222  | 466.978  | 69.334   | 16.078   | 362.086 | 13.667  |
| 35 | -348.154 | 751.2   | 96.0819  | 179.6663 | 2939.4   | 36.944   | 27.222  | 13.262  | 210.08   | 216.888  | 292.694  | -6.445   | 25.319   | 7.555   | 11.777  |
| 36 | -590.609 | 470.1   | 711.8999 | 883.5553 | 587.5    | 81.322   | 23.889  | 7.131   | 143.805  | 735.222  | 448.922  | -0.778   | 10.122   | 13.778  | 12.111  |
| 37 | 361.2086 | 640.3   | 352.6269 | 1940     | 888.6    | 9.789    | 7.667   | 14.253  | 139.778  | 157.667  | 171.589  | 12.778   | -2.011   | 68.778  | -1.667  |
| 38 | -312.7   | 683.2   | 218.1729 | 913.2223 | 613.3    | 39.689   | 6.778   | 62.525  | 95.389   | 524      | 572.289  | 9.889    | 21.989   | 194.333 | -0.111  |
| 39 | 2157.573 | 3845.4  | 2801.173 | 1727.889 | 6165.8   | 854.889  | 34.556  | 421.556 | 267.465  | 11821.13 | 5040.973 | 152.181  | 33.356   | 738.156 | 31.556  |
| 40 | -109.7   | 2167.4  | 1010.082 | 2234.777 | 5528     | 3764.19  | 125.889 | 414.583 | 1179.969 | 1635.333 | 17682.9  | 663.889  | -0.167   | 203.111 | 13.444  |
| 41 | 632.4816 | 2833.8  | -50.9181 | 1625.333 | 5622.1   | 961.653  | 296.378 | 239.778 | 764.278  | 1108.445 | 5588.687 | 1076.978 | 19.078   | 133.111 | 11      |
| 42 | 1744.482 | 4911.9  | 765.4459 | 2842.555 | 7189.9   | 187.233  | 88.333  | 28.424  | 2123.878 | 642.111  | 353.533  | 740.444  | 11.133   | 34.555  | 1.889   |
| 43 | 582.8456 | 6257.2  | 796.4459 | 574.8893 | 2949.8   | 17.433   | 6.777   | 72.433  | 40.242   | 78.555   | 87.333   | -1.556   | 11.333   | 19.444  | 5.777   |
| 44 | 1549.3   | 6526.9  | 572.8999 | 760.4443 | 2503.8   | 16.767   | 10.778  | 119.367 | 130.042  | 112.223  | 221.334  | 0.667    | 22.567   | 36.445  | 0.556   |
| 45 | 1567.209 | 5797.1  | 1088.809 | 1602.889 | 7512.4   | 36.236   | 63.778  | 289.911 | 128.222  | 526.778  | 279.411  | -3.111   | 10.911   | 59.444  | 18.333  |
| 46 | 3622.573 | 9249.8  | 883.4459 | 3854.788 | 12727.46 | 167.933  | 86.151  | 388.333 | 85.424   | 435.666  | 411.633  | 35.222   | 13.933   | 138.111 | 14.111  |
| 47 | 5220.028 | 11884.5 | 4496.173 | 5500.555 | 17363.4  | 357.542  | 44.81   | 221.867 | 333.167  | 304.445  | 1420.834 | 58.238   | 27.667   | 523.205 | 18      |
| 48 | -353.882 | 1395.7  | 640.7179 | 211.5553 | 1770.2   | 99.144   | 38.555  | 47.144  | 379.888  | 242.111  | 390.844  | 5.444    | 34.944   | 86.555  | 14      |
| 49 | 162.7546 | 4700.1  | 2929.264 | 1724.151 | 10311.1  | 711.136  | 427.944 | 171.027 | 144.444  | 722.535  | 3246.301 | 470.829  | 1496.044 | 21.555  | 873.194 |
| 50 | -516.609 | 1492.7  | 618.7179 | -339.667 | 0        | 64.022   | 421.355 | 15.622  | 70.722   | 137.778  | 222.122  | 31.555   | 50.222   | 8.889   | 66.555  |
| 51 | -553.609 | 754.5   | 1319.627 | 625.7773 | 1996     | 9.944    | 42      | 11.544  | 68.171   | 189.777  | 113.544  | 21.555   | 8.044    | 19      | 4.333   |
| 52 | 80.14357 | 2135.4  | 1138.809 | 783.4443 | 5376.1   | 30.022   | 25.555  | 26.422  | 36.313   | 660.444  | 160.622  | 102.778  | 4.522    | 55.333  | -1.778  |
| 53 | 377.6636 | 2037.9  | -38.8271 | 593.7773 | 4025.1   | 324.653  | 7.667   | 21.378  | 84.869   | 485.889  | 864.334  | 1952.578 | -2.522   | 29.207  | 3.889   |
| 54 | 1030.209 | 5487.6  | 193.5359 | 1436.889 | 7255.4   | 188.556  | 24.667  | 45.578  | 224.323  | 346.111  | 1860.111 | 168.334  | 5.078    | 24.778  | 3.889   |
| 55 | 1060.028 | 5634.9  | 1004.991 | 849.4443 | 5694.8   | 238.333  | 35.556  | 30.4    | 278.833  | 316.667  | 905.1    | 152.889  | 9.3      | 17.222  | 14.222  |
| 56 | 1939.482 | 6718.9  | 936.4459 | 1728.666 | 6976.6   | 86.133   | 14.889  | 13.833  | 303.333  | 366.555  | 183.333  | 82.777   | 6.633    | 20.444  | 2.111   |
| 57 | 1858.755 | 7426.6  | 1230.446 | 1594.444 | 3266.7   | 15.178   | 7.778   | 21.978  | 4.051    | 216.445  | 103.678  | -8.111   | 2.278    | -0.444  | 3.667   |
| 58 | 3233.028 | 7517.6  | 1334.718 | 3192.222 | 4397.555 | 17.522   | 21.444  | 122.522 | 17.222   | 1050.949 | 1164.858 | 1.222    | 6.022    | 28.889  | 8.778   |
| 59 | 1983.755 | 8075.6  | 852.2639 | 1949.333 | 5918.2   | -11.333  | -2.666  | 39.167  | 62.212   | 1184.485 | 242.889  | 55.667   | -27.633  | -8.889  | -26.889 |
| 60 | 1525.209 | 7869.0  | 1421.536 | 2826     | 6767.5   | 43.944   | 16.111  | 45.666  | 91.353   | 213.222  | 232.144  | 4.555    | 2.744    | 26.444  | 7.444   |
| 61 | 1095.3   | 8340.6  | 648.5359 | 2039.444 | 3357.3   | 107.856  | 37.667  | 54.156  | 74.101   | 3454.623 | 228.985  | -0.222   | 15.556   | 31.223  | 6.889   |
| 62 | 445.4816 | 5717.5  | 814.7179 | 1379.333 | 3560.2   | 73.822   | 130.555 | 41.922  | 150.767  | 4060.495 | 534.222  | 0.666    | 23.722   | 35.555  | 87.778  |
| 63 | 1116.209 | 3735.2  | 1487.627 | 555.7773 | 1898.6   | 50.222   | 21.333  | 51.347  | 114.022  | 279.222  | 475.936  | 24.597   | 34.793   | 17.222  | 47.055  |
| 64 | 1059.3   | 5344.5  | 1845.809 | 516.4443 | 3412.8   | 27.878   | 14.778  | 25.178  | 109.653  | 130.556  | 180.378  | 10.778   | 12.178   | 11.111  | 18.667  |
| 65 | 261.1176 | 6324.9  | 2961.082 | 846.0003 | 7649.3   | 7.433    | 12.111  | 8.633   | 60.904   | 196.333  | 132.133  | -1.667   | 0.533    | 9.555   | 3.889   |
| 66 | 4106.973 | 5840.6  | 7496.991 | 3843.222 | 17577.37 | 39.233   | 52.666  | 158.633 | 73.878   | 361.555  | 139.133  | 10.555   | -5.467   | 2.222   | -5.556  |

|       |          |          |          |          |          |         |          |          |         |          |         |         |         |         |        |
|-------|----------|----------|----------|----------|----------|---------|----------|----------|---------|----------|---------|---------|---------|---------|--------|
| 67    | 3310.573 | 14211.8  | 4998.355 | 5835.111 | 15127.4  | 44.056  | 42.223   | 65.256   | 83.011  | 163.667  | 222.856 | 67      | -1.344  | 34.889  | 1.112  |
| 68    | 2791.664 | 14216.4  | 1839.991 | 6243.06  | 17157.37 | 86.433  | 52.666   | 39.133   | 90.788  | 196.111  | 534.333 | 38.777  | 3.933   | 16.222  | 2.222  |
| 69    | 4669.573 | 17842.9  | 2764.082 | 4012     | 11441.7  | 297.667 | 94.223   | 93.267   | 115.849 | 592      | 566.267 | 33.778  | 8.667   | 29.223  | 6.556  |
| 70    | 3448.482 | 17271.2  | 3651.991 | 6563.633 | 8992.2   | 97.078  | 50.153   | 48.578   | 163.323 | 727.778  | 231.178 | 19.556  | 13.178  | 104.921 | 3.778  |
| 71    | 4970.937 | 10457.1  | 2181.082 | 4219.666 | 5655.6   | 18.364  | 16.222   | 36.4     | 21.364  | 134.889  | 95.727  | -2.556  | 3.2     | 8.111   | -3.111 |
|       |          |          |          |          |          |         |          |          |         |          |         |         |         |         |        |
| N417N |          |          |          |          |          |         |          |          |         |          |         |         |         |         |        |
| 29    | 4217.118 | 10766.68 | 2788.627 | 2386.111 | 8558.017 | 48.142  | 40       | 52.978   | 130.051 | 194.556  | 871.778 | 9.222   | 7.478   | 52.667  | 0.222  |
| 30    | 3562.664 | 13991.4  | 2955.173 | 6844.666 | 11278.93 | 28.525  | 54.222   | 156.289  | 188.162 | 341.445  | 341.889 | 291.756 | -2.611  | 50.111  | 6.111  |
| 31    | 761.7546 | 8268.675 | 1232.173 | 3159.444 | 3155.1   | 64.707  | 290      | 54.589   | 380.351 | 676.222  | 378.98  | 28.333  | 11.489  | 47.222  | 41.667 |
| 32    | 1325.482 | 6500.22  | 3253.536 | 3263.889 | 7501.4   | 651.644 | 465.361  | 344.277  | 542.08  | 582      | 511.353 | 108.544 | 399.829 | 72.111  | 65.555 |
| 33    | 1867.118 | 10858.58 | 3653.809 | 3548.444 | 6614.3   | 268.264 | 407.434  | 117.889  | 690.822 | 340.445  | 331.344 | 5.778   | 23.789  | 120.735 | 34.556 |
| N417T |          |          |          |          |          |         |          |          |         |          |         |         |         |         |        |
| 29    | 2757.573 | 7307.402 | 3687.718 | 3254.111 | 11435.4  | 62.485  | 109.223  | 56.167   | 55.303  | 517.556  | 478.122 | 8.556   | 7.867   | 21.334  | 12.445 |
| 30    | 1084.573 | 17339.77 | 9771.173 | 4062.222 | 14326.6  | 25.818  | 75.222   | 35.9     | 168.545 | 626.778  | 225.727 | 24.111  | 6.6     | 166.429 | 20.667 |
| 31    | 858.3906 | 7182.493 | 2483.355 | 3178.889 | 10349.7  | 55.838  | 404.611  | 22.011   | 123.929 | 1206     | 291.747 | 24      | 17.611  | 82.656  | 9.444  |
| 32    | 2472.664 | 7329.675 | 1902.627 | 2668.444 | 11144.1  | 373.889 | 1923.197 | 180.289  | 234.162 | 1880.778 | 964.616 | 35.445  | 147.972 | 82.556  | 5.889  |
| 33    | 2182.118 | 15713.04 | 4810.991 | 6492.444 | 8218.4   | 432.587 | 662.598  | 51.044   | 487.301 | 2005.666 | 459.808 | 6.555   | 42.744  | 516.675 | 0.222  |
| E484K |          |          |          |          |          |         |          |          |         |          |         |         |         |         |        |
| 52    | 2924.846 | 9065.675 | 2575.355 | 3591.333 | 16943.6  | 83.08   | 50.888   | 32.544   | 40.626  | 383.444  | 105.044 | -8.667  | -2.056  | -8.778  | 2.333  |
| 53    | 2507.209 | 7142.402 | 2184.9   | 3950.444 | 12114.1  | 38.889  | 77.889   | 1061.489 | 19.707  | 221.445  | 132.489 | 12.389  | -0.011  | 12.667  | 15.222 |
| 54    | 3428.118 | 7688.13  | 4884.991 | 3585.444 | 9925.6   | 55.273  | 252.556  | 68.9     | 53      | 347.111  | 205.5   | 2       | 11.1    | 6.222   | 9.111  |
| 55    | 3128.937 | 8151.22  | 4931.173 | 4643.889 | 12089.6  | 97.079  | 206.666  | 43.222   | 107.131 | 421.222  | 104.522 | -1.222  | 43.079  | 11.555  | -0.111 |
| 56    | 2383.391 | 8093.039 | 4252.355 | 4041.111 | 11561.4  | 148.445 | 139.889  | 33.278   | 64.403  | 760.111  | 152.878 | -2.889  | 15.178  | 16.889  | 2.889  |
| N501Y |          |          |          |          |          |         |          |          |         |          |         |         |         |         |        |
| 57    | 2262.209 | 7069.948 | 5450.264 | 3454.555 | 13795.2  | 135.292 | 159.467  | 11.967   | 39.167  | 576.778  | 224.567 | -8.111  | -1.333  | 3       | -1.666 |
| 58    | 2989.573 | 7605.311 | 4383.627 | 3898.222 | 9998.8   | 122.051 | 247.978  | 45.445   | 56.678  | 525.111  | 626.028 | 0.222   | 9.278   | 10.222  | 11.222 |
| 59    | 3274.482 | 5450.402 | 3166.446 | 3356.333 | 13039.2  | 99.778  | 222.078  | 25.978   | 101.505 | 688.334  | 390.378 | 8.889   | 2.478   | 42.889  | 37.445 |
| 60    | 2696.209 | 7658.039 | 3545.264 | 4425.444 | 17699.2  | 59.929  | 136.333  | 31.311   | 64.747  | 935.444  | 200.411 | -3.667  | 1.911   | 95.111  | 4.667  |
| 61    | 1722.846 | 7234.948 | 4839.718 | 4558.111 | 10792.3  | 116.04  | 200.555  | 28.422   | 117.04  | 4042.389 | 187.122 | 0.111   | 8.522   | 38.111  | -2.334 |
